# Supplementary material
Source: Springer Nature journal article supplement (https://www.springermedizin.de/resource/supplementary/12872_2010_316_MOESM1_ESM.pdf/9429684)

**A**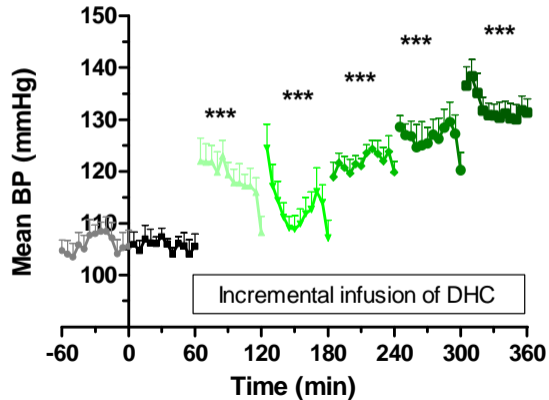**B**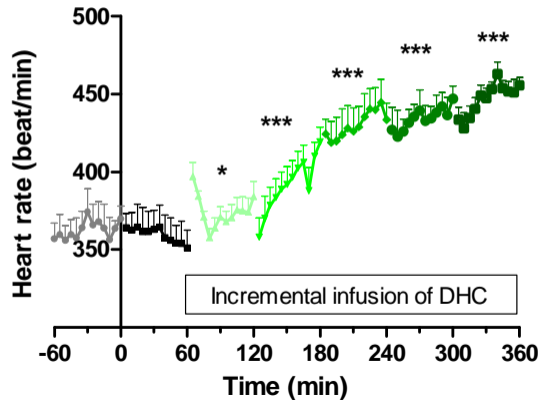**C**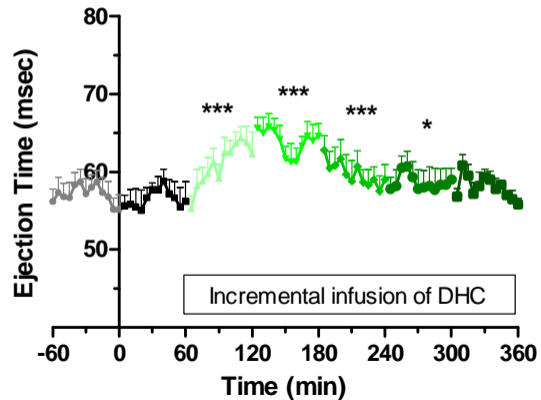

Supplement: MOESM1 [file 9429684]
